# Supplementary material
Source: HighWire-hosted journal article supplement (http://www.qdcxjkg.com/highwire/filestream/113668/field_highwire_adjunct_files/1/ONLINE_FigureE2_DOWN.pdf)
Supplement: ONLINE_FigureE2_DOWN.pdf [file ONLINE_FigureE2_DOWN.pdf]

Relative Expression (%)

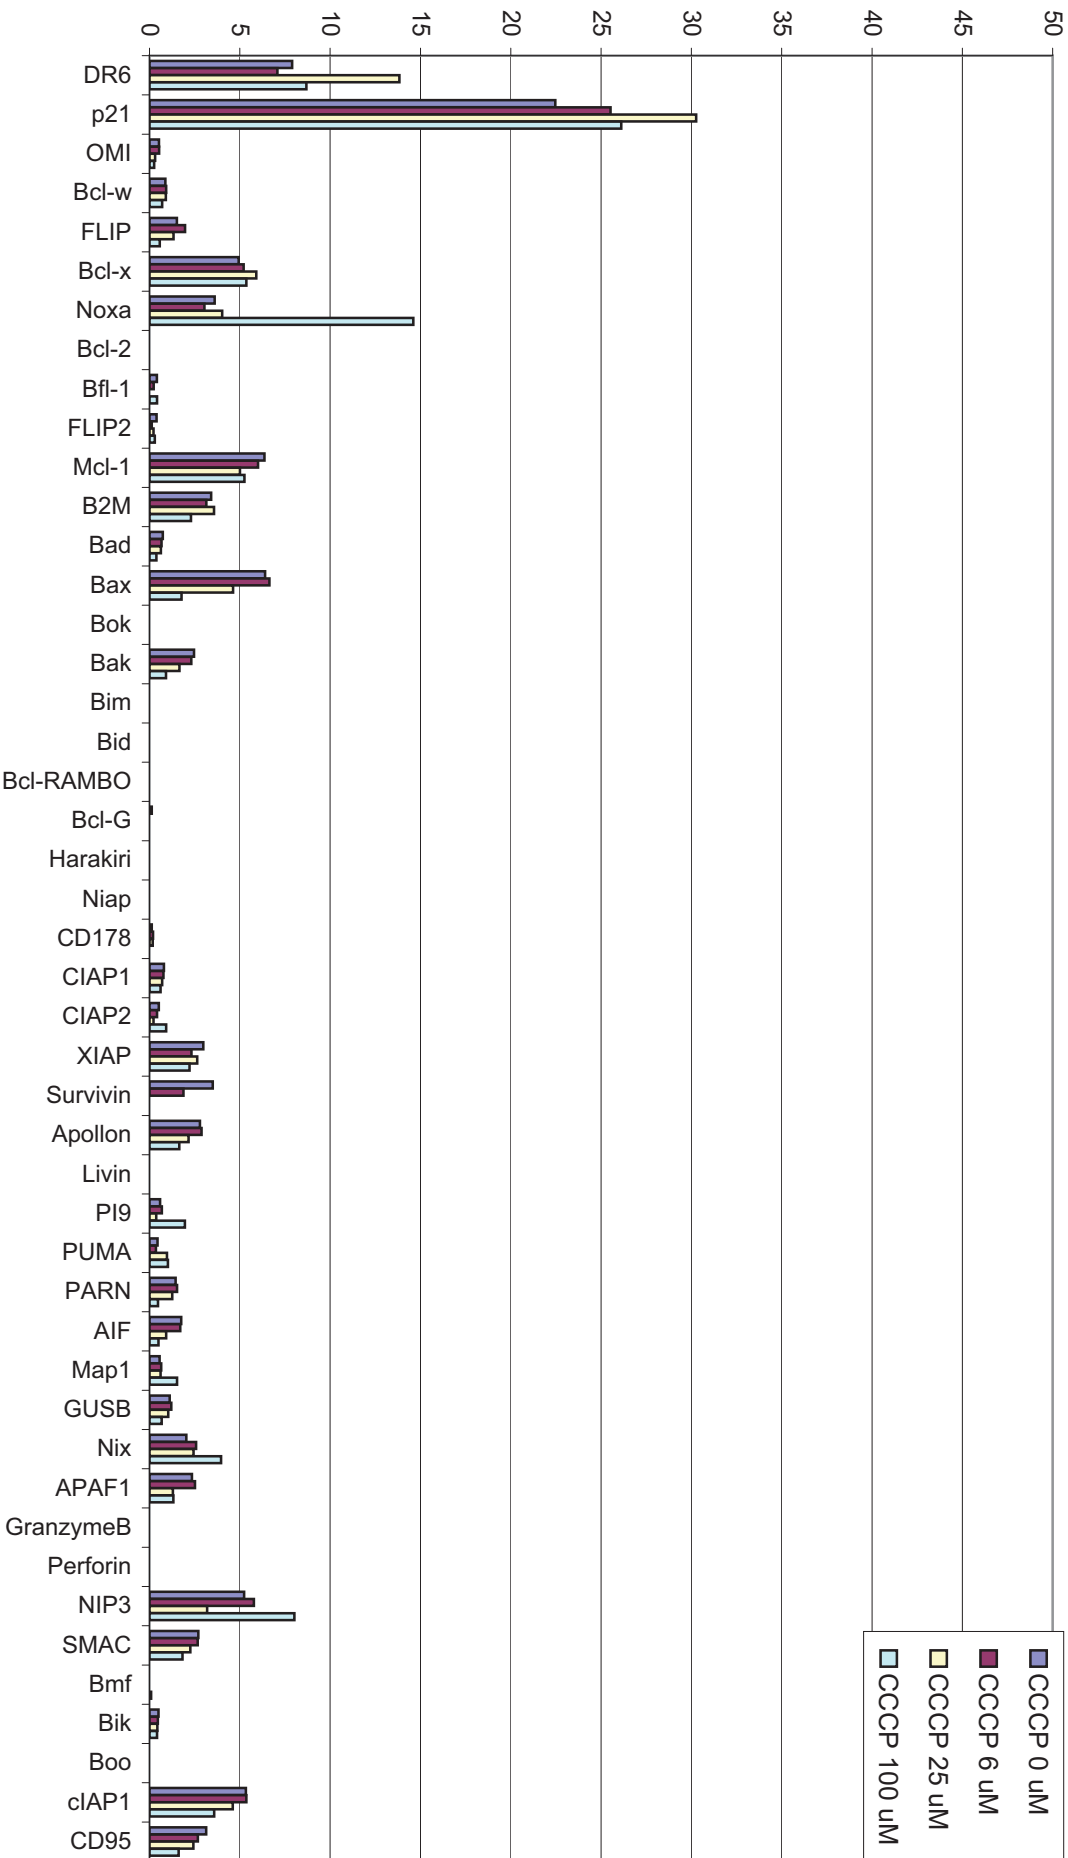

Figure E2
